# Supplementary material for: A machine learning-integrated stepwise method to discover novel anti-obesity phytochemicals that antagonize the glucocorticoid receptor
Source: Royal Society of Chemistry journal article supplement (doi:10.1039/d2fo03466b), 2023-01-01
Supplement: d2fo03466b1.pdf [file d2fo03466b1.pdf]

## Electronic Supplementary Material (ESI):

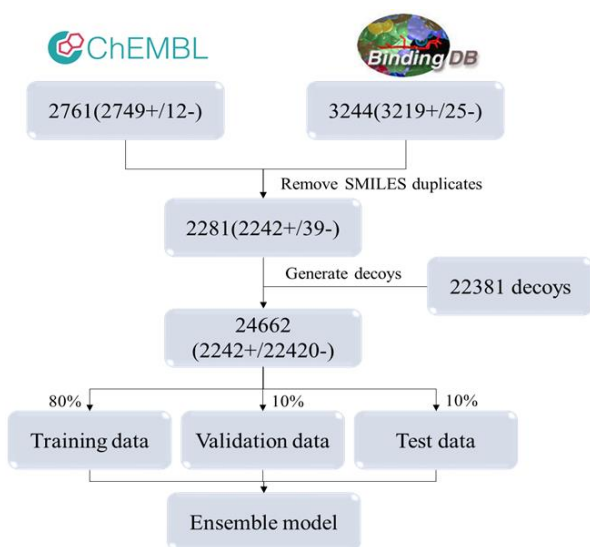

**Fig. S1** Data preparation procedure for Model Bind.

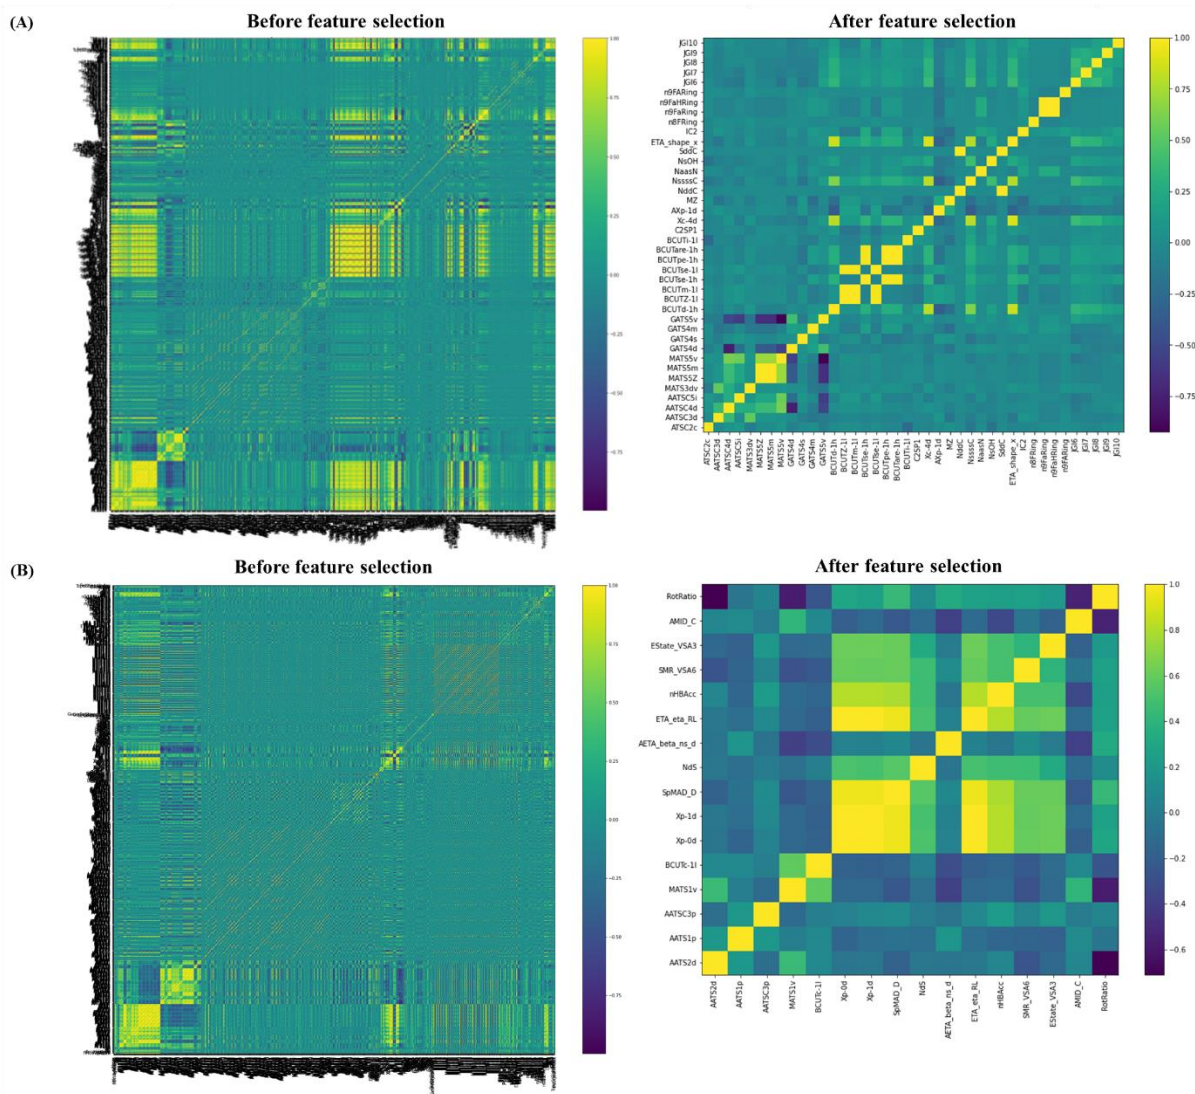

**Fig. S2** Intercorrelation matrix between the molecular descriptors before and after feature selection for (A) Model Bind and (B) Model Ant.

**Table S1** Molecular descriptors identified via feature selection for each model.

| Model                                             | Molecular Descriptor                 | Description                                                                                  |
|---------------------------------------------------|--------------------------------------|----------------------------------------------------------------------------------------------|
| <b>Model Bind:</b><br>GR binding prediction model | ATSC2c                               | averaged and centered moreau-broto autocorrelation of lag 2 weighted by gasteiger charge     |
|                                                   | AATSC3d                              | averaged and centered moreau-broto autocorrelation of lag 3 weighted by sigma electrons      |
|                                                   | AATSC4d                              | averaged and centered moreau-broto autocorrelation of lag 4 weighted by sigma electrons      |
|                                                   | AATSC5i                              | averaged and centered moreau-broto autocorrelation of lag 5 weighted by ionization potential |
|                                                   | MATS3dv                              | moran coefficient of lag 3 weighted by valence electrons                                     |
|                                                   | MATS5Z                               | moran coefficient of lag 5 weighted by atomic number                                         |
|                                                   | MATS5m                               | moran coefficient of lag 5 weighted by mass                                                  |
|                                                   | MATS5v                               | moran coefficient of lag 5 weighted by vdw volume                                            |
|                                                   | GATS4d                               | geary coefficient of lag 4 weighted by sigma electrons                                       |
|                                                   | GATS4s                               | geary coefficient of lag 4 weighted by intrinsic state                                       |
|                                                   | GATS4m                               | geary coefficient of lag 4 weighted by mass                                                  |
|                                                   | GATS5v                               | geary coefficient of lag 5 weighted by vdw volume                                            |
|                                                   | BCUTd-1h                             | first highest eigenvalue of Burden matrix weighted by sigma electrons                        |
|                                                   | BCUTZ-1l                             | first lowest eigenvalue of Burden matrix weighted by atomic number                           |
|                                                   | BCUTm-1l                             | first lowest eigenvalue of Burden matrix weighted by mass                                    |
|                                                   | BCUTse-1h                            | first highest eigenvalue of Burden matrix weighted by sanderson EN                           |
|                                                   | BCUTse-1l                            | first lowest eigenvalue of Burden matrix weighted by sanderson EN                            |
|                                                   | BCUTpe-1h                            | first highest eigenvalue of Burden matrix weighted by pauling EN                             |
|                                                   | BCUTare-1h                           | first heighest eigenvalue of Burden matrix weighted by allred-rocow EN                       |
|                                                   | BCUTi-1l                             | first lowest eigenvalue of Burden matrix weighted by ionization potential                    |
|                                                   | C2SP1                                | SP carbon bound to 2 other carbons                                                           |
|                                                   | Xc-4d                                | 4-ordered Chi cluster weighted by sigma electrons                                            |
|                                                   | AXp-1d                               | 1-ordered averaged Chi path weighted by sigma electrons                                      |
|                                                   | MZ                                   | mean of constitutional weighted by atomic number                                             |
|                                                   | NddC                                 | number of ddC                                                                                |
|                                                   | NssssC                               | number of ssssC                                                                              |
|                                                   | NaasN                                | number of aasN                                                                               |
|                                                   | NsOH                                 | number of sOH                                                                                |
|                                                   | SddC                                 | sum of ddC                                                                                   |
|                                                   | ETA_shape_x                          | ETA shape index (type: x)                                                                    |
|                                                   | IC2                                  | 2-ordered neighborhood information content                                                   |
|                                                   | n8FRing                              | 8-membered fused ring count                                                                  |
|                                                   | n9FaRing                             | 9-membered aromatic fused ring count                                                         |
|                                                   | n9FaHRing                            | 9-membered aromatic fused hetero ring count                                                  |
| n9FARing                                          | 9-membered aromatic fused ring count |                                                                                              |
| JGI6                                              | 6-ordered mean topological charge    |                                                                                              |

|                                                                        |                       |                                                                                        |
|------------------------------------------------------------------------|-----------------------|----------------------------------------------------------------------------------------|
|                                                                        | JGI7                  | 7-ordered mean topological charge                                                      |
|                                                                        | JGI8                  | 8-ordered mean topological charge                                                      |
|                                                                        | JGI9                  | 9-ordered mean topological charge                                                      |
|                                                                        | JGI10                 | 10-ordered mean topological charge                                                     |
| <b>Model</b><br><b>Ant:</b><br>GR<br>antagonist<br>prediction<br>model | AATS2d                | averaged moreau-broto autocorrelation of lag 2 weighted by sigma electrons             |
|                                                                        | AATS1p                | averaged moreau-broto autocorrelation of lag 1 weighted by polarizability              |
|                                                                        | AATSC3p               | averaged and centered moreau-broto autocorrelation of lag 3 weighted by polarizability |
|                                                                        | MATS1v                | moran coefficient of lag 1 weighted by vdw volume                                      |
|                                                                        | BCUTc-11              | first lowest eigenvalue of Burden matrix weighted by gasteiger charge                  |
|                                                                        | Xp-0d                 | 0-ordered Chi path weighted by sigma electrons                                         |
|                                                                        | Xp-1d                 | 1-ordered Chi path weighted by sigma electrons                                         |
|                                                                        | SpMAD_D               | spectral mean absolute deviation from distance matrix                                  |
|                                                                        | NdS                   | number of dS                                                                           |
|                                                                        | AETA_beta_ns_d        | averaged delta contribution to valence electron mobile count                           |
|                                                                        | ETA_eta_RL            | local ETA composite index for reference graph                                          |
|                                                                        | nHBacc                | number of hydrogen bond acceptor                                                       |
|                                                                        | SMR_VSA6              | MOE MR VSA Descriptor 6 ( 2.75 <= x < 3.05)                                            |
|                                                                        | EState_VSA3           | EState VSA Descriptor 3 ( 0.29 <= x < 0.72)                                            |
|                                                                        | AMID_C                | averaged molecular ID on C atoms                                                       |
| RotRatio                                                               | rotatable bonds ratio |                                                                                        |

**Table S2** Performance metrics of the four classification models to construct Model Ant.

|           | RF            | XGB            | SVM           | DL            |
|-----------|---------------|----------------|---------------|---------------|
| MCC       | 0.646 (0.050) | 0.646 (0.045)  | 0.650 (0.046) | 0.653 (0.061) |
| Accuracy  | 0.809 (0.026) | 0.797 (0.032)  | 0.814 (0.026) | 0.803 (0.042) |
| Precision | 0.928 (0.034) | 0.976 (0.014)  | 0.918 (0.027) | 0.963 (0.022) |
| Recall    | 0.697 (0.038) | 0.0634 (0.073) | 0.722 (0.039) | 0.664 (0.077) |
| AUC       | 0.818 (0.026) | 0.808 (0.032)  | 0.823 (0.022) | 0.817 (0.035) |

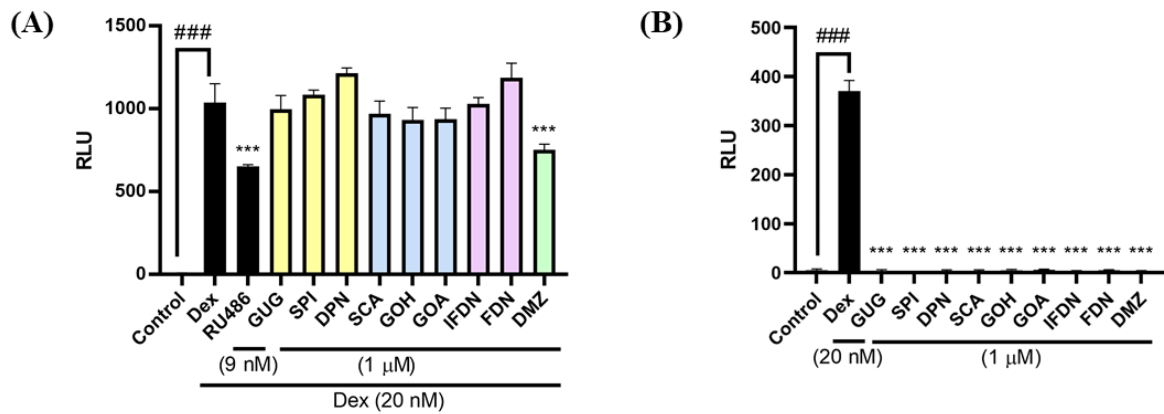

**Fig. S3** (A) Inhibition of Dex (20 nM)-induced luciferase activity by the predicted phytochemicals (1 μM) and RLU measurements. (B) RLU induced by the predicted phytochemicals at a concentration of 1 μM without treatment with Dex. The data are represented as mean ± standard deviation (n=3). ###, significantly different from control by (p < 0.001). Significantly different from Dex by \*\*\* (p < 0.001).

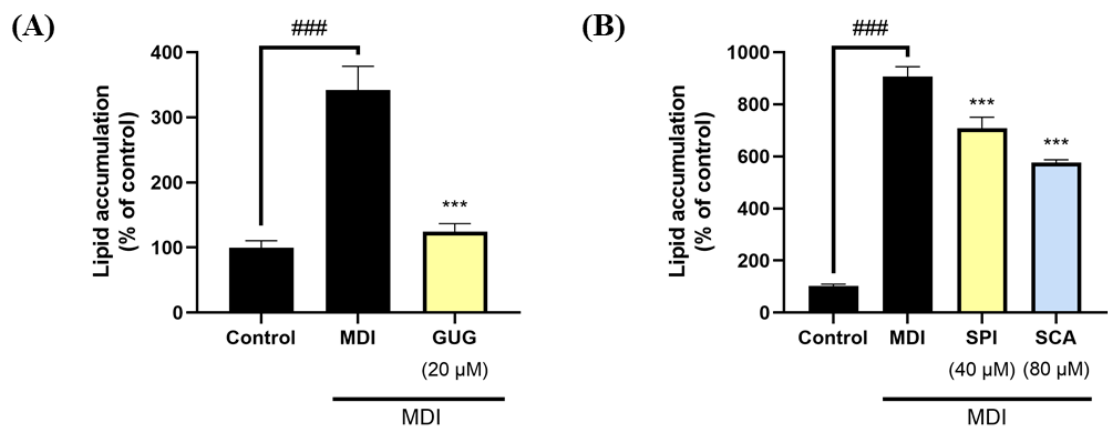

**Fig. S4.** Effects of the phytochemicals on intracellular lipid accumulations in 3T3-L1 mature adipocytes. The 3T3-L1 preadipocytes were treated with phytochemicals for 6 days of differentiation. The data are represented as mean  $\pm$  standard deviation (n=3). ###, significantly different from control by ( $p < 0.001$ ). Significantly different from MDI-treated group by \*\*\* ( $p < 0.001$ ).
